# Supplementary material
Source: publisher site journal article supplement (https://www.spandidos-publications.com/4640/downloadSupplementary)
Supplement: Supplementary file 1 [file downloadSupplementary]

Table SI. Stereotactic radiation therapy summary.

| Parameter                 | Description                                                                                                                                                                   |
|---------------------------|-------------------------------------------------------------------------------------------------------------------------------------------------------------------------------|
| Treatment machine         | Varian TrueBeam linear accelerator                                                                                                                                            |
| Treatment planning system | RayStation 7                                                                                                                                                                  |
| Beam energy               | 6 MV flattening filter free photon beam                                                                                                                                       |
| Technique                 | Volumetric modulated arc therapy with 2 beams total (i.e., 1 clockwise beam and 1 counterclockwise beam)                                                                      |
| Target volumes            | The GTV was contoured using CT and MRI imaging, and the PTV was created using a 2-mm isotropic expansion around the GTV. A CTV was not utilized as per institutional standard |
| Prescription objectives   | $D_{95\%} \geq 100\%$ and $R_{100\%} \geq 0.83$                                                                                                                               |
| Patient position          | Supine, headfirst, arms on chest, knee-fix underneath legs                                                                                                                    |
| Patient immobilization    | Thermoplastic shell fitted around the patient's head and secured to the treatment table                                                                                       |
| Image verification        | Daily cone-beam CT                                                                                                                                                            |

CTV, clinical target volume; GTV, gross tumour volume; PTV, planning target volume;  $D_{95\%} \geq 100\%$ , dose to 95% of the PTV volume to be greater than or equal to 100% of the prescription dose;  $R_{100\%} \geq 0.83$ , conformity index of at least 0.83 at the 100% isodose line.
